# Supplementary material for: A Family of Algorithms for Computing Consensus about Node State from Network Data
Source: PubMed Central journal article supplement (PMC3715438; doi:10.1371/journal.pcbi.1003109), 2013-07-18

**D**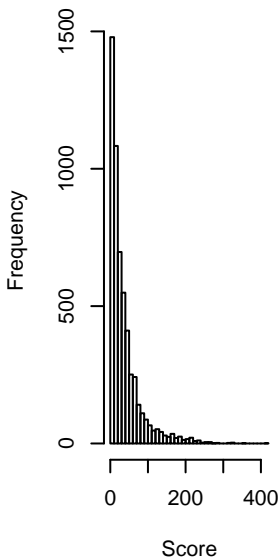**R**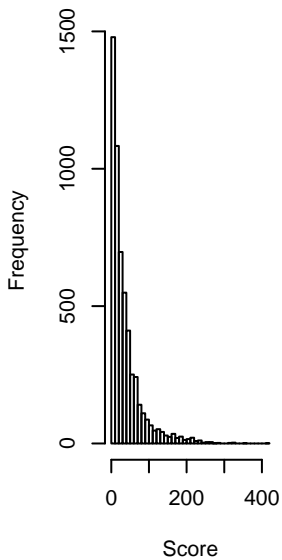 $\Delta$ 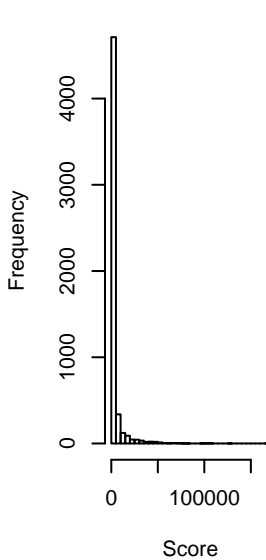 $\Pi$ 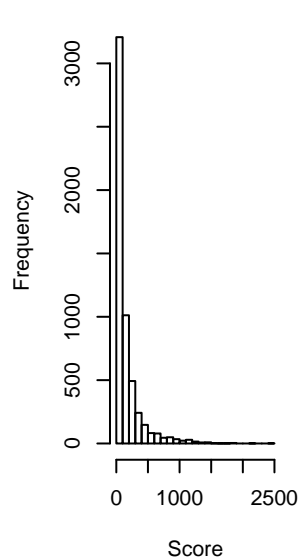**C**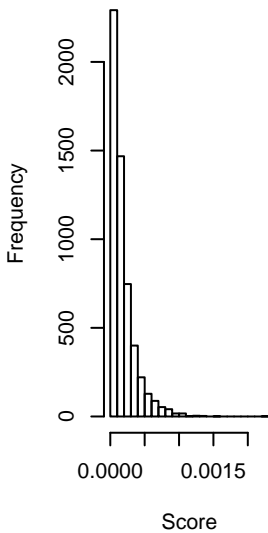**GL**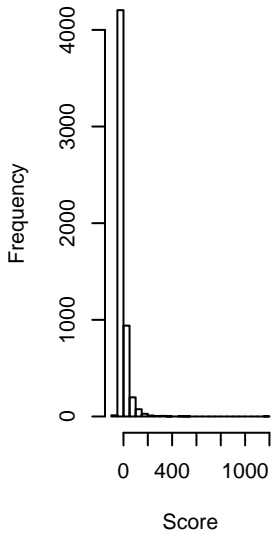 $\beta$ 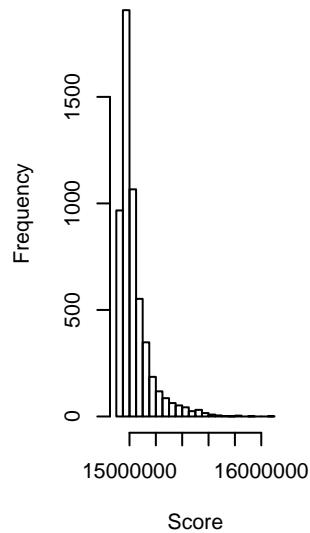

Supplement: pcbi.1003109.s004.pdf [file pcbi.1003109.s004.pdf]
