# Supplementary material for: A Family of Algorithms for Computing Consensus about Node State from Network Data
Source: PubMed Central journal article supplement (PMC3715438; doi:10.1371/journal.pcbi.1003109), 2013-07-18

**A**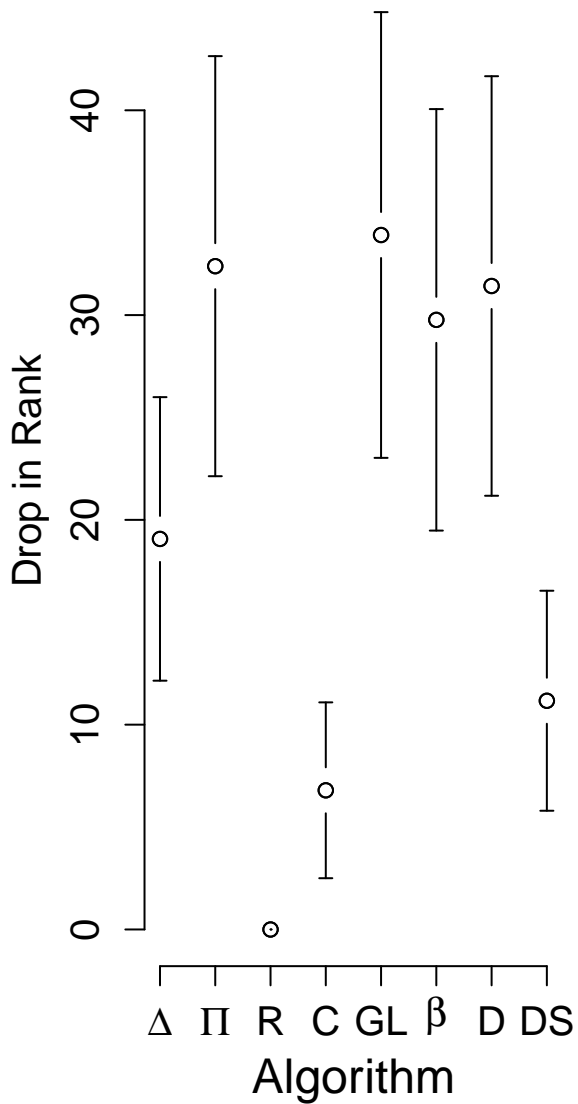**B**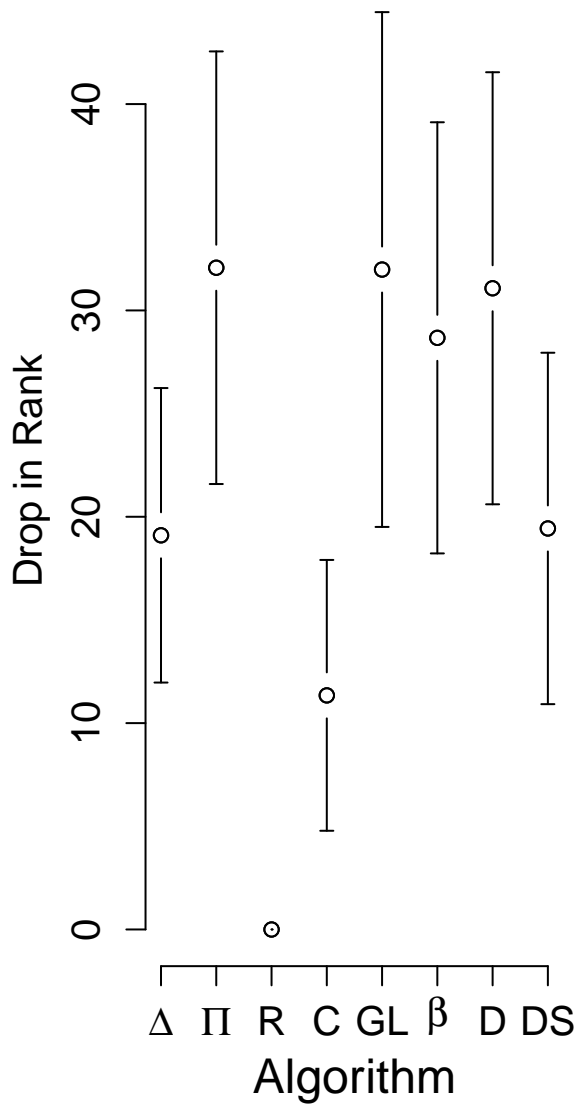

Supplement: pcbi.1003109.s011.pdf [file pcbi.1003109.s011.pdf]
