# Supplementary material for: A Family of Algorithms for Computing Consensus about Node State from Network Data
Source: PLOS journal article supplement (doi:10.1371/journal.pcbi.1003109), 2013-07-18

**D**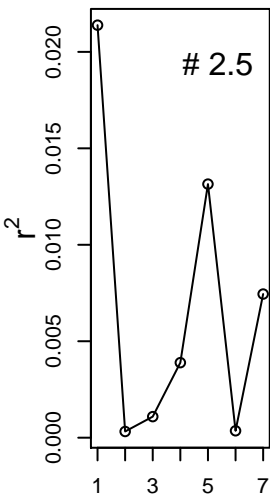**R**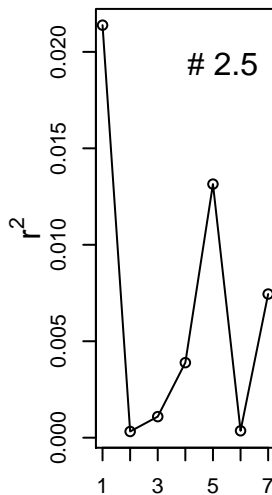 **$\Delta$** 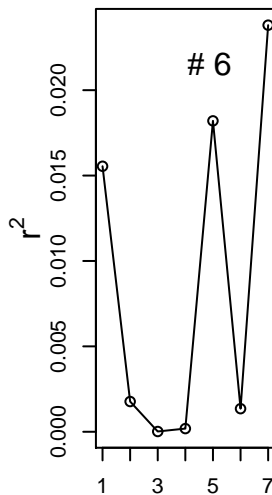 **$\Pi$** 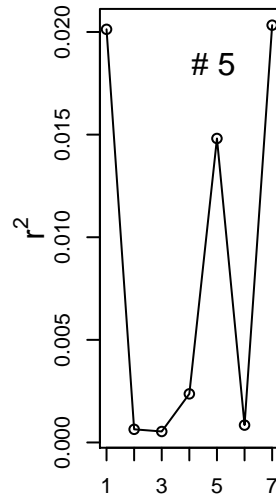**C**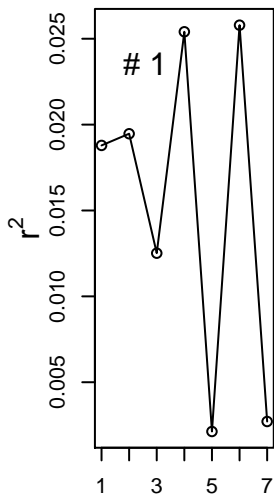**GL**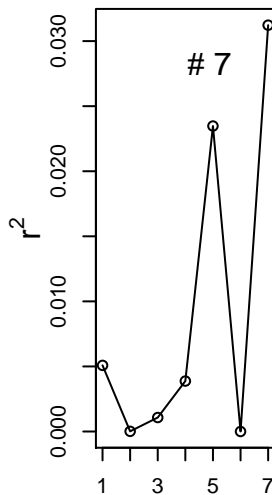 **$\beta$** 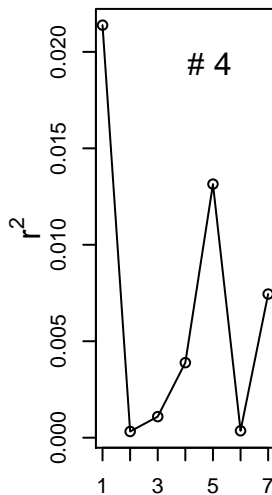

Supplement: S5 (10.1371/journal.pcbi.1003109.s005) [file journal.pcbi.1003109.s005]
