# Supplementary material for: A Family of Algorithms for Computing Consensus about Node State from Network Data
Source: PLOS journal article supplement (doi:10.1371/journal.pcbi.1003109), 2013-07-18

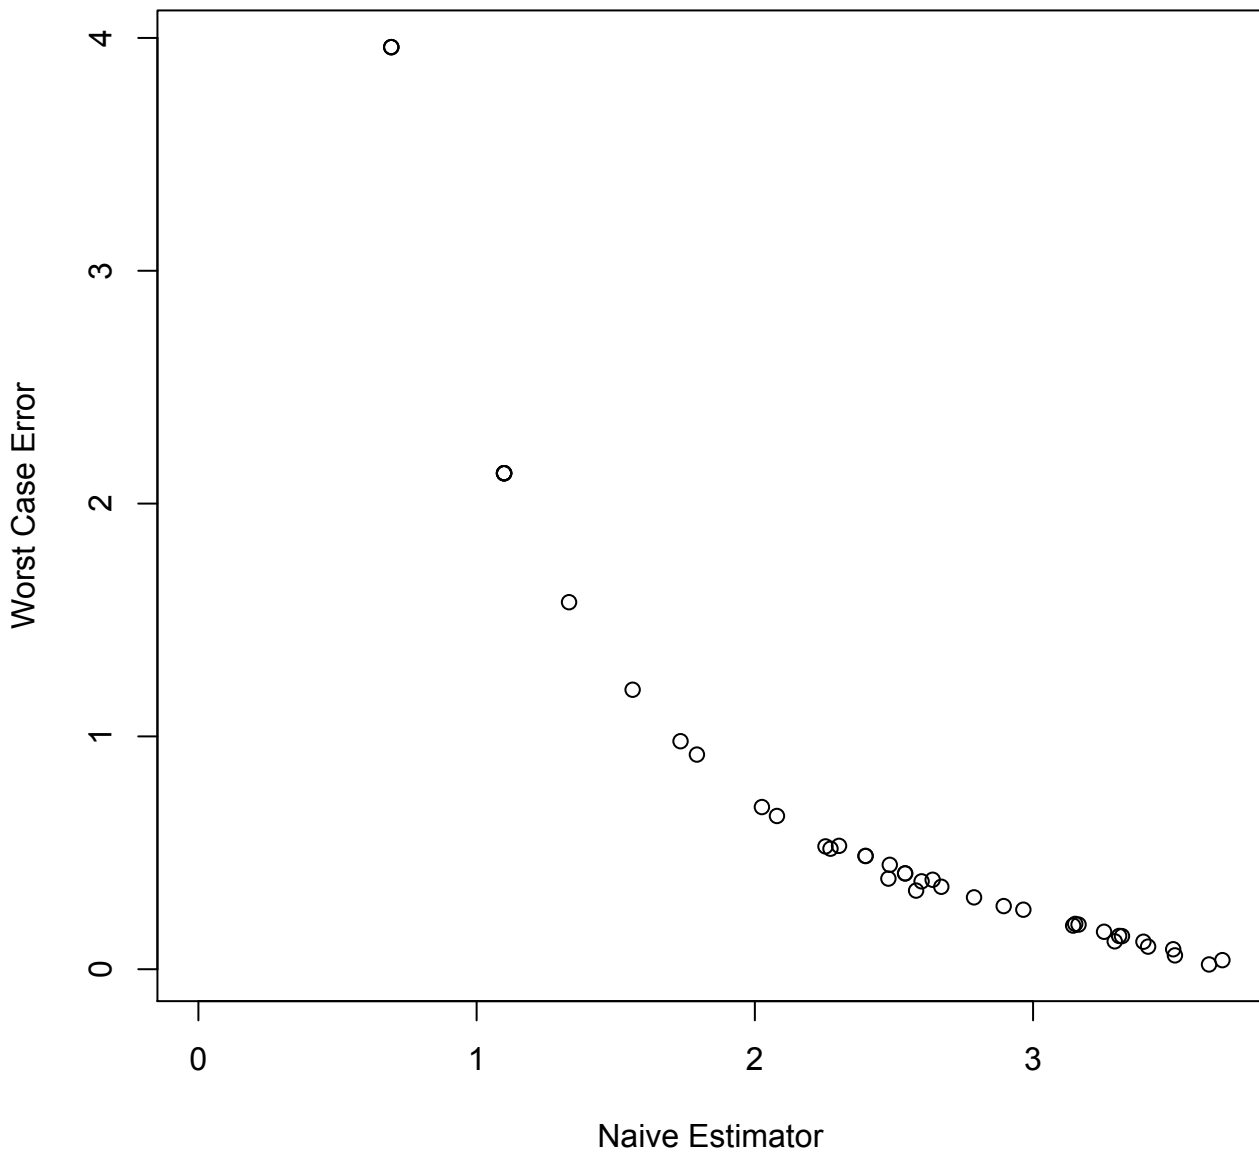

Supplement: S7 (10.1371/journal.pcbi.1003109.s007) [file journal.pcbi.1003109.s007]
